# Supplementary material for: Prediction of clinical outcome and survival in soft-tissue sarcoma using a ten-lncRNA signature
Source: PubMed Central journal article supplement (PMC5655202; doi:10.18632/oncotarget.18165), 2017-05-22
Supplement: oncotarget-08-80336-s001.pdf [file oncotarget-08-80336-s001.pdf]

## Prediction of clinical outcome and survival in soft-tissue sarcoma using a ten-lncRNA signature

### SUPPLEMENTARY MATERIALS

**Supplementary Table 1: The association of the risk score of the ten-lncRNA signature with clinical features in soft-tissue sarcoma patients. See Supplementary\_Table\_1**

**Supplementary Table 2: The association between the lncRNAs and metastasis in sarcoma patients**

| LncRNAs       | Metastasis | <i>t</i> -test |      |       |          |          | ROC   |             |          | Spearman |          |
|---------------|------------|----------------|------|-------|----------|----------|-------|-------------|----------|----------|----------|
|               |            | <i>n</i>       | mean | SD    | <i>t</i> | <i>P</i> | AUC   | 95%CIs      | <i>P</i> | <i>r</i> | <i>P</i> |
| RP11-560J1.2  | no         | 119            | 3.39 | 1.385 | -1.186   | 0.237    | 0.555 | 0.478-0.630 | 0.2242   | 0.092    | 0.228    |
|               | yes        | 56             | 3.66 | 1.379 |          |          |       |             |          |          |          |
| AP001432.14   | no         | 119            | 3.1  | 1.362 | -0.282   | 0.778    | 0.505 | 0.429-0.582 | 0.9052   | 0.009    | 0.907    |
|               | yes        | 56             | 3.16 | 1.187 |          |          |       |             |          |          |          |
| RP4-665J23.1  | no         | 119            | 7.84 | 1.6   | -1.553   | 0.122    | 0.615 | 0.538-0.687 | 0.0146   | 0.189    | 0.012    |
|               | yes        | 56             | 8.27 | 1.892 |          |          |       |             |          |          |          |
| LINC00680     | no         | 119            | 8.24 | 1.006 | -0.884   | 0.378    | 0.543 | 0.466-0.619 | 0.326    | 0.074    | 0.333    |
|               | yes        | 56             | 8.38 | 0.906 |          |          |       |             |          |          |          |
| AC006129.2    | no         | 119            | 4.58 | 1.875 | 1.205    | 0.23     | 0.55  | 0.473-0.625 | 0.2847   | -0.082   | 0.283    |
|               | yes        | 56             | 4.21 | 1.866 |          |          |       |             |          |          |          |
| RP11-230G5.2  | no         | 119            | 2.94 | 1.633 | -1.172   | 0.245    | 0.539 | 0.462-0.614 | 0.4213   | 0.064    | 0.399    |
|               | yes        | 56             | 3.38 | 2.534 |          |          |       |             |          |          |          |
| BACH1-IT2     | no         | 119            | 2.99 | 1.108 | 0.351    | 0.726    | 0.513 | 0.436-0.589 | 0.7799   | -0.021   | 0.779    |
|               | yes        | 56             | 2.93 | 1.11  |          |          |       |             |          |          |          |
| RP11-274B21.9 | no         | 119            | 3.94 | 1.304 | 0.697    | 0.487    | 0.529 | 0.452-0.605 | 0.5393   | -0.048   | 0.526    |
|               | yes        | 56             | 3.79 | 1.522 |          |          |       |             |          |          |          |
| RP11-504A18.1 | no         | 119            | 3.17 | 1.317 | -0.526   | 0.6      | 0.552 | 0.475-0.627 | 0.2698   | 0.087    | 0.254    |
|               | yes        | 56             | 3.29 | 1.51  |          |          |       |             |          |          |          |
| RP11-713P17.3 | no         | 119            | 4.84 | 1.813 | 0.943    | 0.347    | 0.527 | 0.450-0.603 | 0.573    | -0.044   | 0.56     |
|               | yes        | 56             | 4.55 | 2.008 |          |          |       |             |          |          |          |



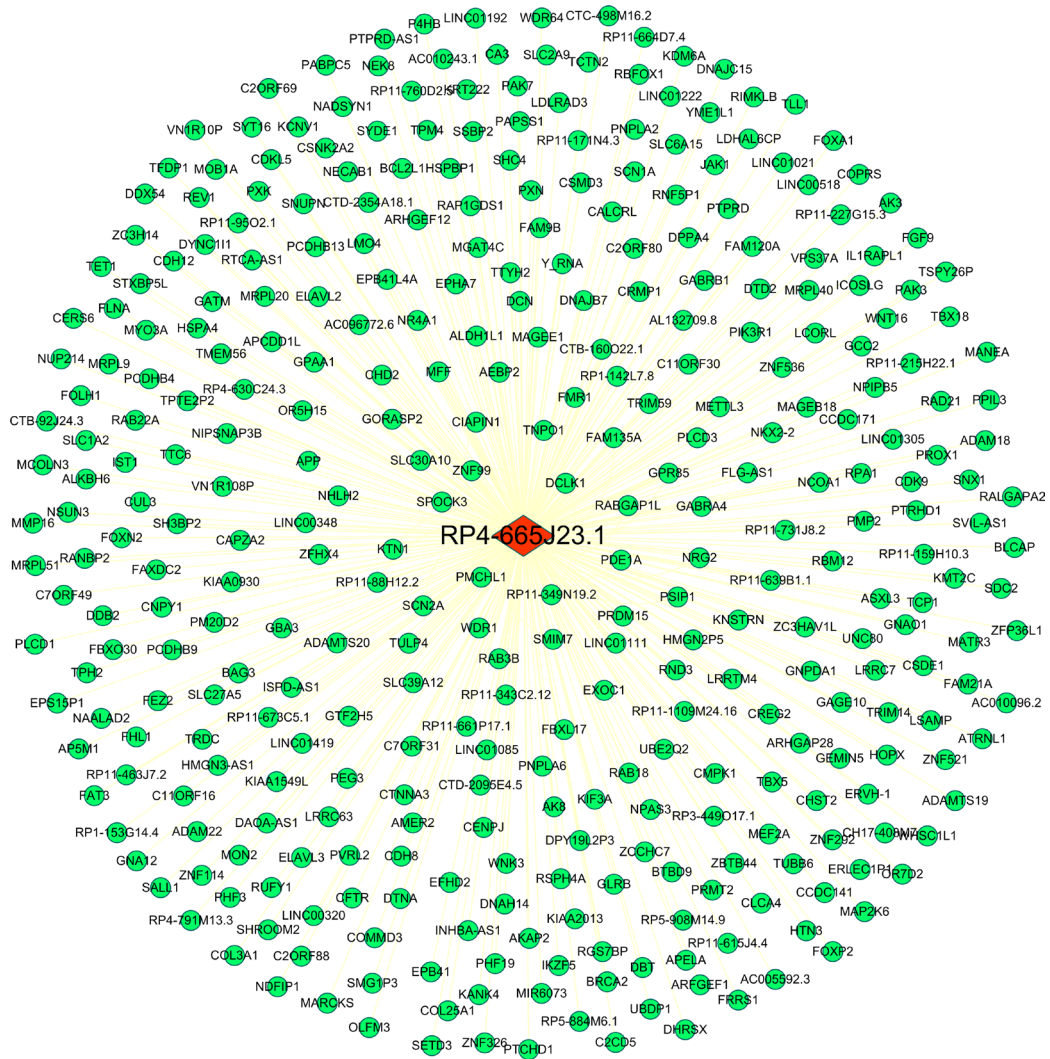

Supplementary Figure 2: Regulation network of lncRNA RP4-665J23.1 by multi experiment matrix.

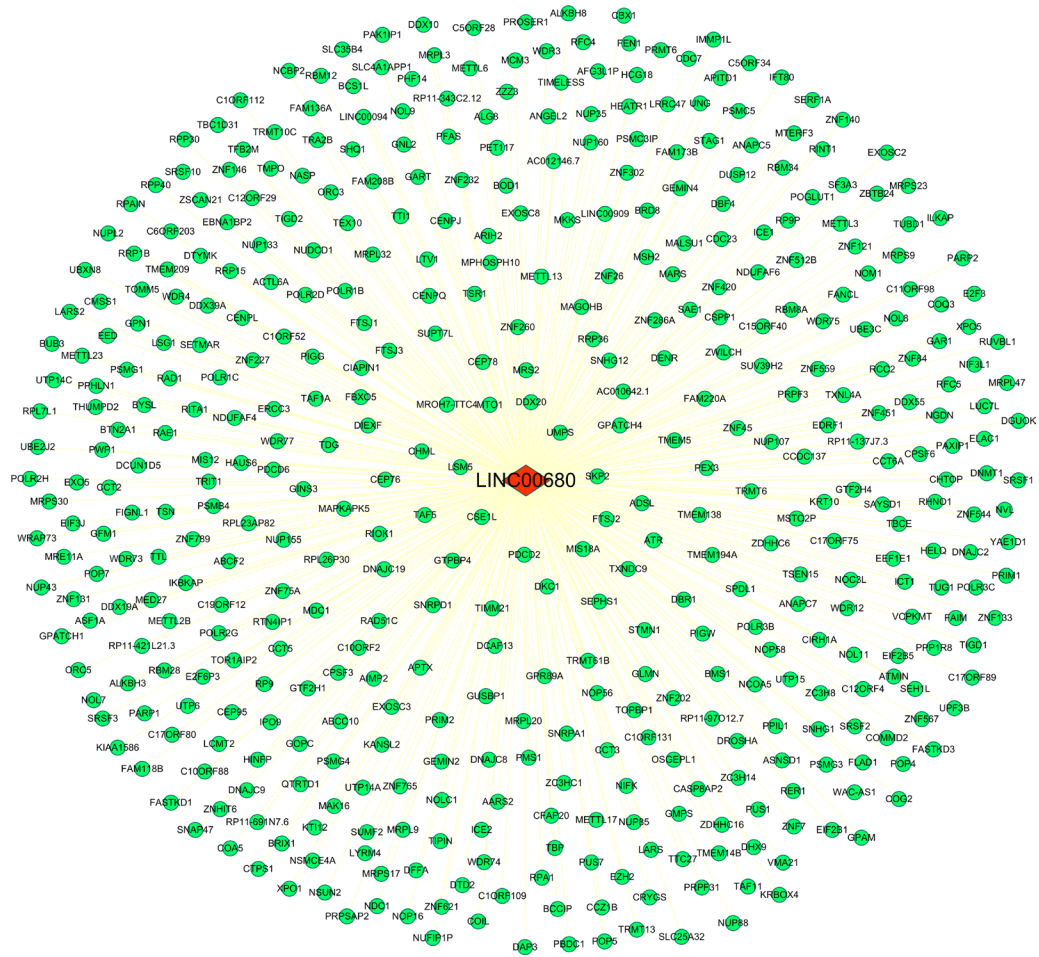

Supplementary Figure 3: Regulation network of lncRNA LINC00680 by multi experiment matrix.

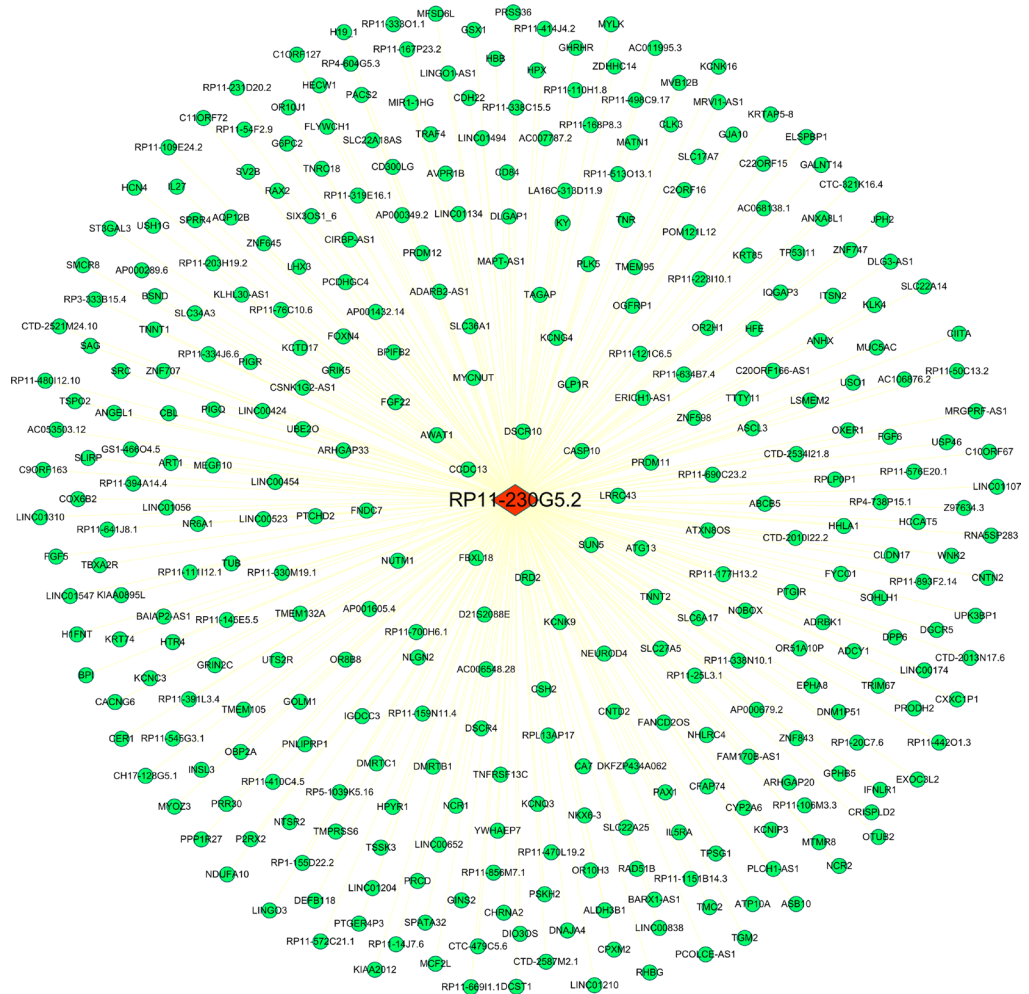

Supplementary Figure 4: Regulation network of lncRNA RP11-230G5.2 by multi experiment matrix.

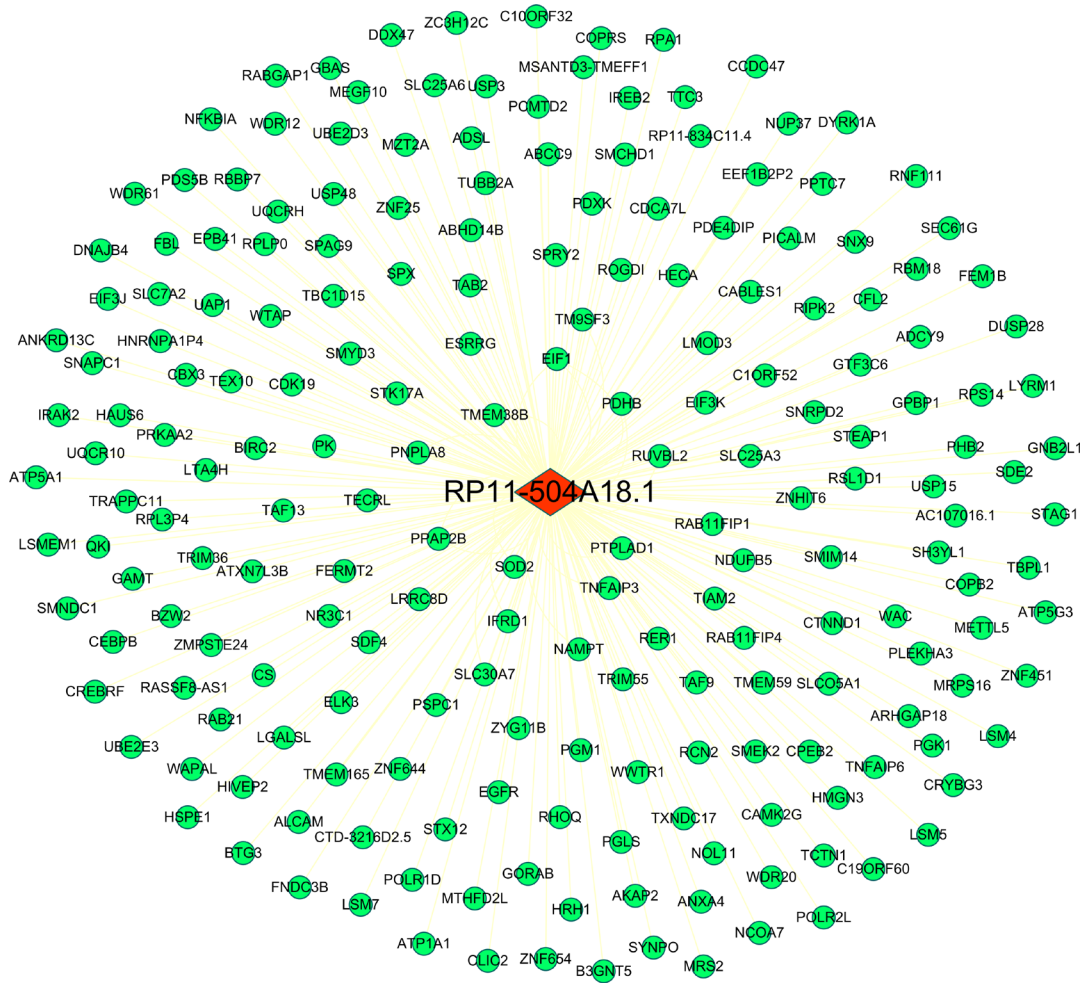

Supplementary Figure 5: Regulation network of lncRNA RP11-504A18.1 by multi experiment matrix.



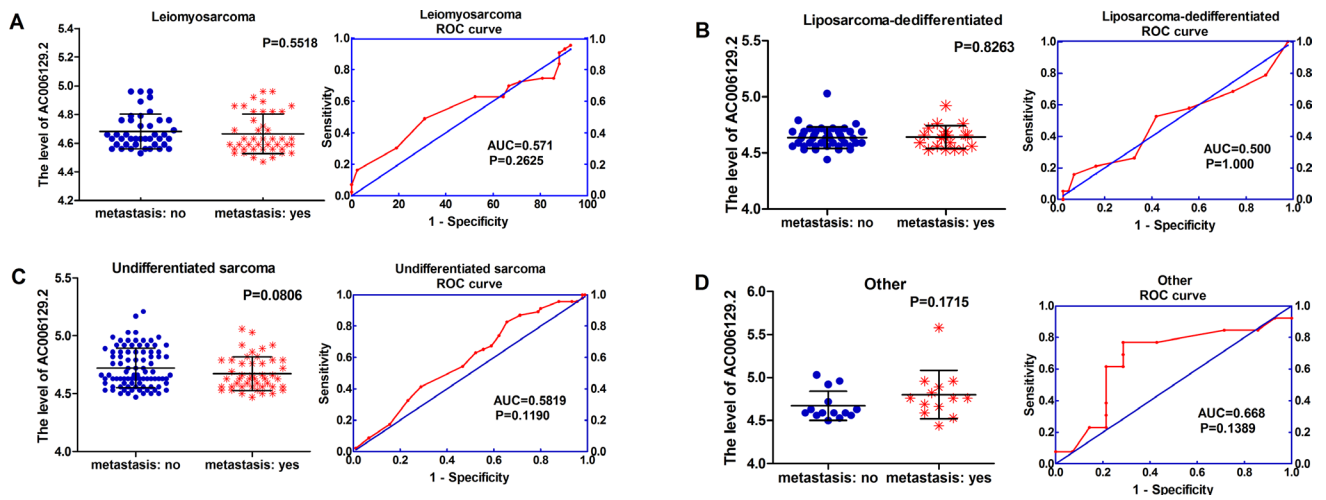

Supplementary Figure 7: Relationship between AC006129.2 level and metastasis in soft-tissue sarcoma based on GEO GSE21050.

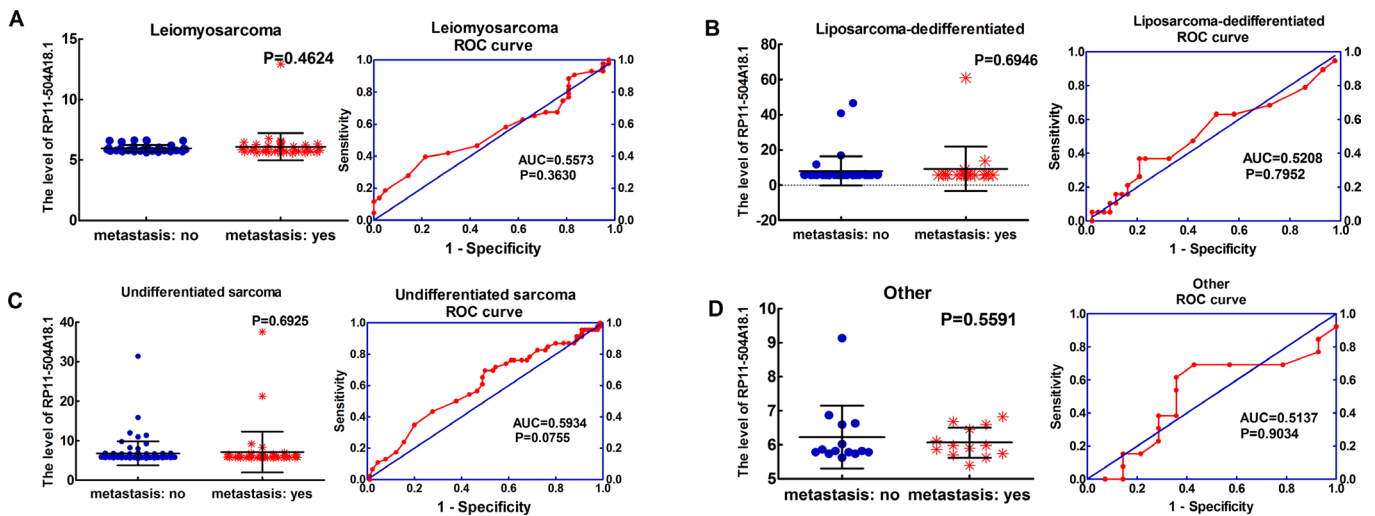

Supplementary Figure 8: Relationship between RP11-504A18.1 level and metastasis in soft-tissue sarcoma based on GEO GSE21050.
